# Supplementary material for: Evolutionary Analyses and Natural Selection of Betaine-Homocysteine S-Methyltransferase (BHMT) and BHMT2 Genes
Source: PubMed Central journal article supplement (PMC4516251; doi:10.1371/journal.pone.0134084), 2015-07-27
Supplement: pone.0134084.s003.pdf [file pone.0134084.s003.pdf]

Supplementary Table S3: Single breakpoint (SBP) analysis summary.

| Information Criterion | Recombination inferred? | Information Criterion improvement | Breakpoint location | Model averaged support |
|-----------------------|-------------------------|-----------------------------------|---------------------|------------------------|
| AIC                   | Yes                     | 495.6                             | 794                 | 100%                   |
| cAIC                  | Yes                     | 431.3                             | 794                 | 100%                   |
| BIC                   | No                      | N/A                               | N/A                 | 0%                     |

SBP analysis suggested the presence of recombination. AIC is the Akaike information criterion; cAIC is the consistent Akaike information criterion and BIC is the Bayesian information criterion. These are statistical criteria for model selection among a class of parametric models. N/A means not applicable. Despite these results, examination of segment specific phylogenetic trees suggested that the apparent incongruence was likely due to relatively rapid evolutionary rates among small mammals (Wu CI and Li WH, *PNAS* 1985, 82:1741-1745), and not to actual recombination.
